# Supplementary material
Source: PubMed Central journal article supplement (PMC6152941)
Supplement: NIHMS1505607-supplement-1.pdf [file NIHMS1505607-supplement-1.pdf]

Figure S1

proximal → distal

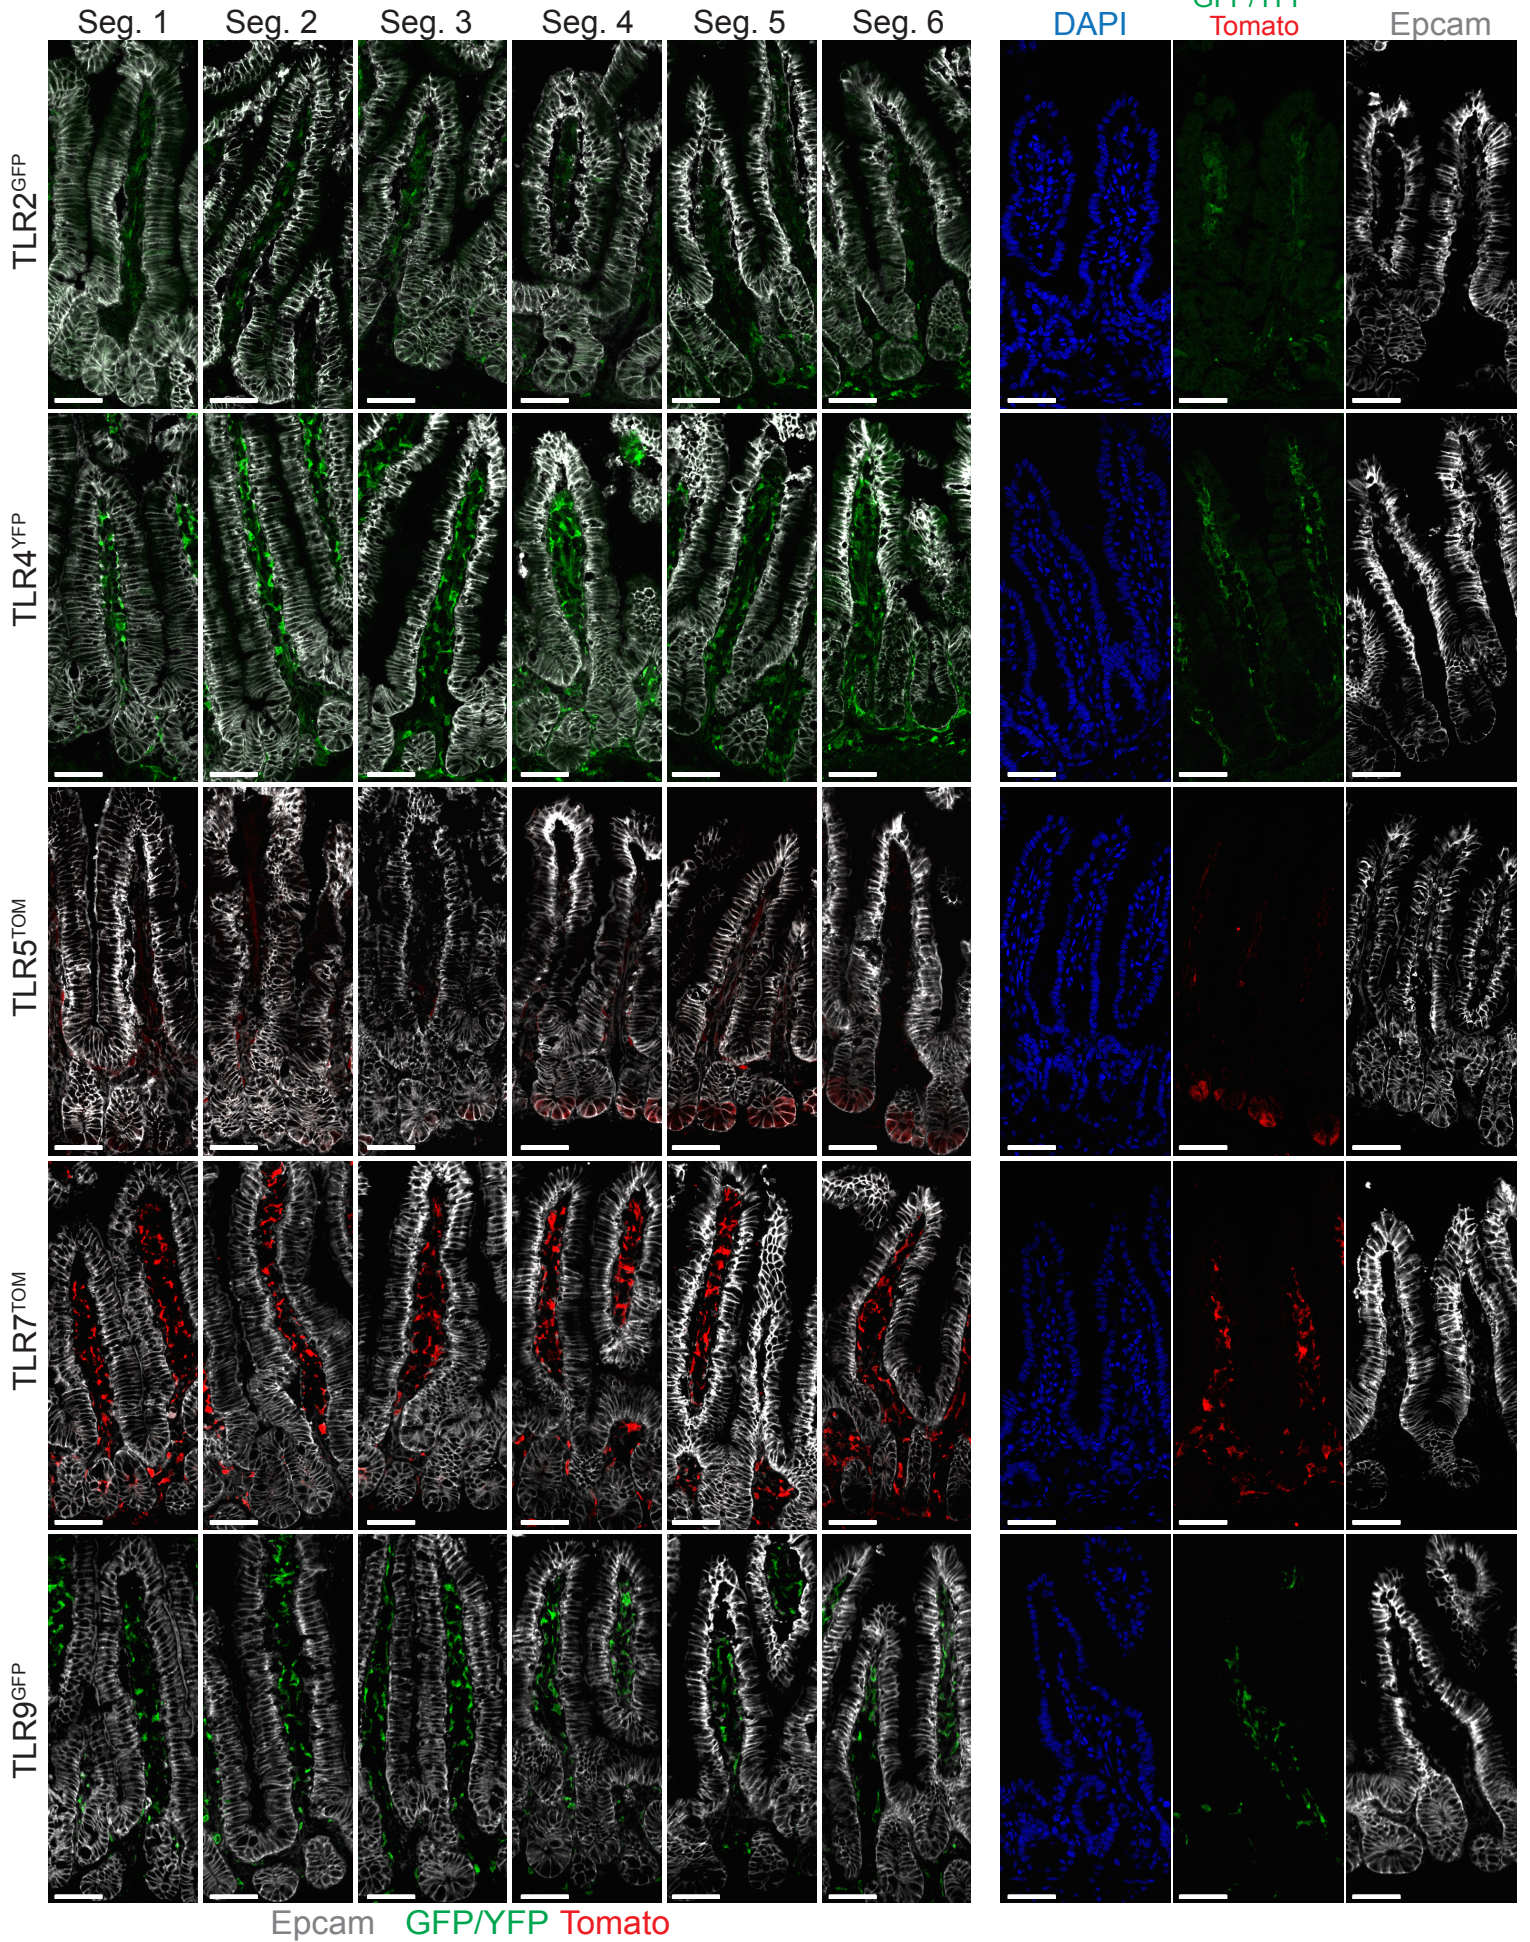



**Figure S1: TLR expression throughout the SI, (Related to Figure 1).**

SI from TLR reporter mice were divided into six equivalently sized segments and resulting sections were stained with Epcam (epithelial cells) and antibodies to either GFP/YFP or tomato (TLR reporters). Images are numbered and shown from proximal to distal segments of the SI. In the right panels, a single image from the ileum of reporter mice is separated into individual colors to aid in visualization of IEC staining. Images were taken at 20x magnification and exposures were set using staining of WT mouse tissues. Images are representative of at least 2 independent experiments, each including 2-4 mice. Scale bars are 50 microns.



## Figure S2

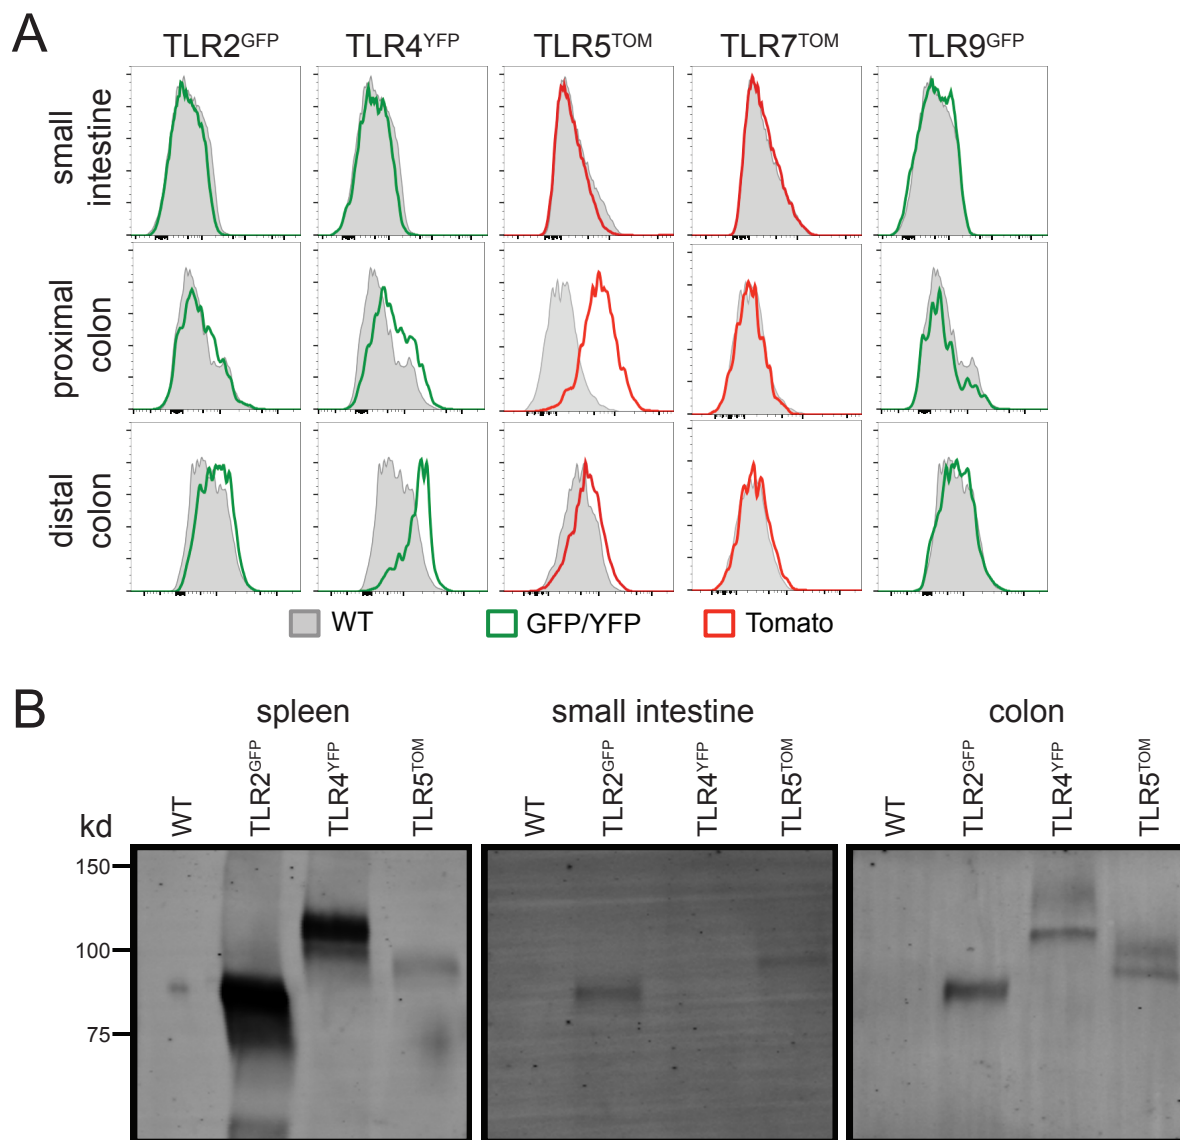

### Figure S2: Characterization of TLR reporter mice, (Related to Figure 1).

(A) Flow cytometry of total IECs (live, CD45<sup>-</sup>Epcam<sup>+</sup>) gated from IEC preparations from TLR reporter mice and WT controls. Flow cytometry plots are representative of 3 independent experiments, each including 2-4 mice of each genotype.

(B) Immunoblots of TLR proteins stained with anti-HA after first being immunoprecipitated from total splenocytes, SI IECs, or colon IECs using the HA tag engineered into the reporter constructs. Experiment was repeated 2 times.



Figure S3

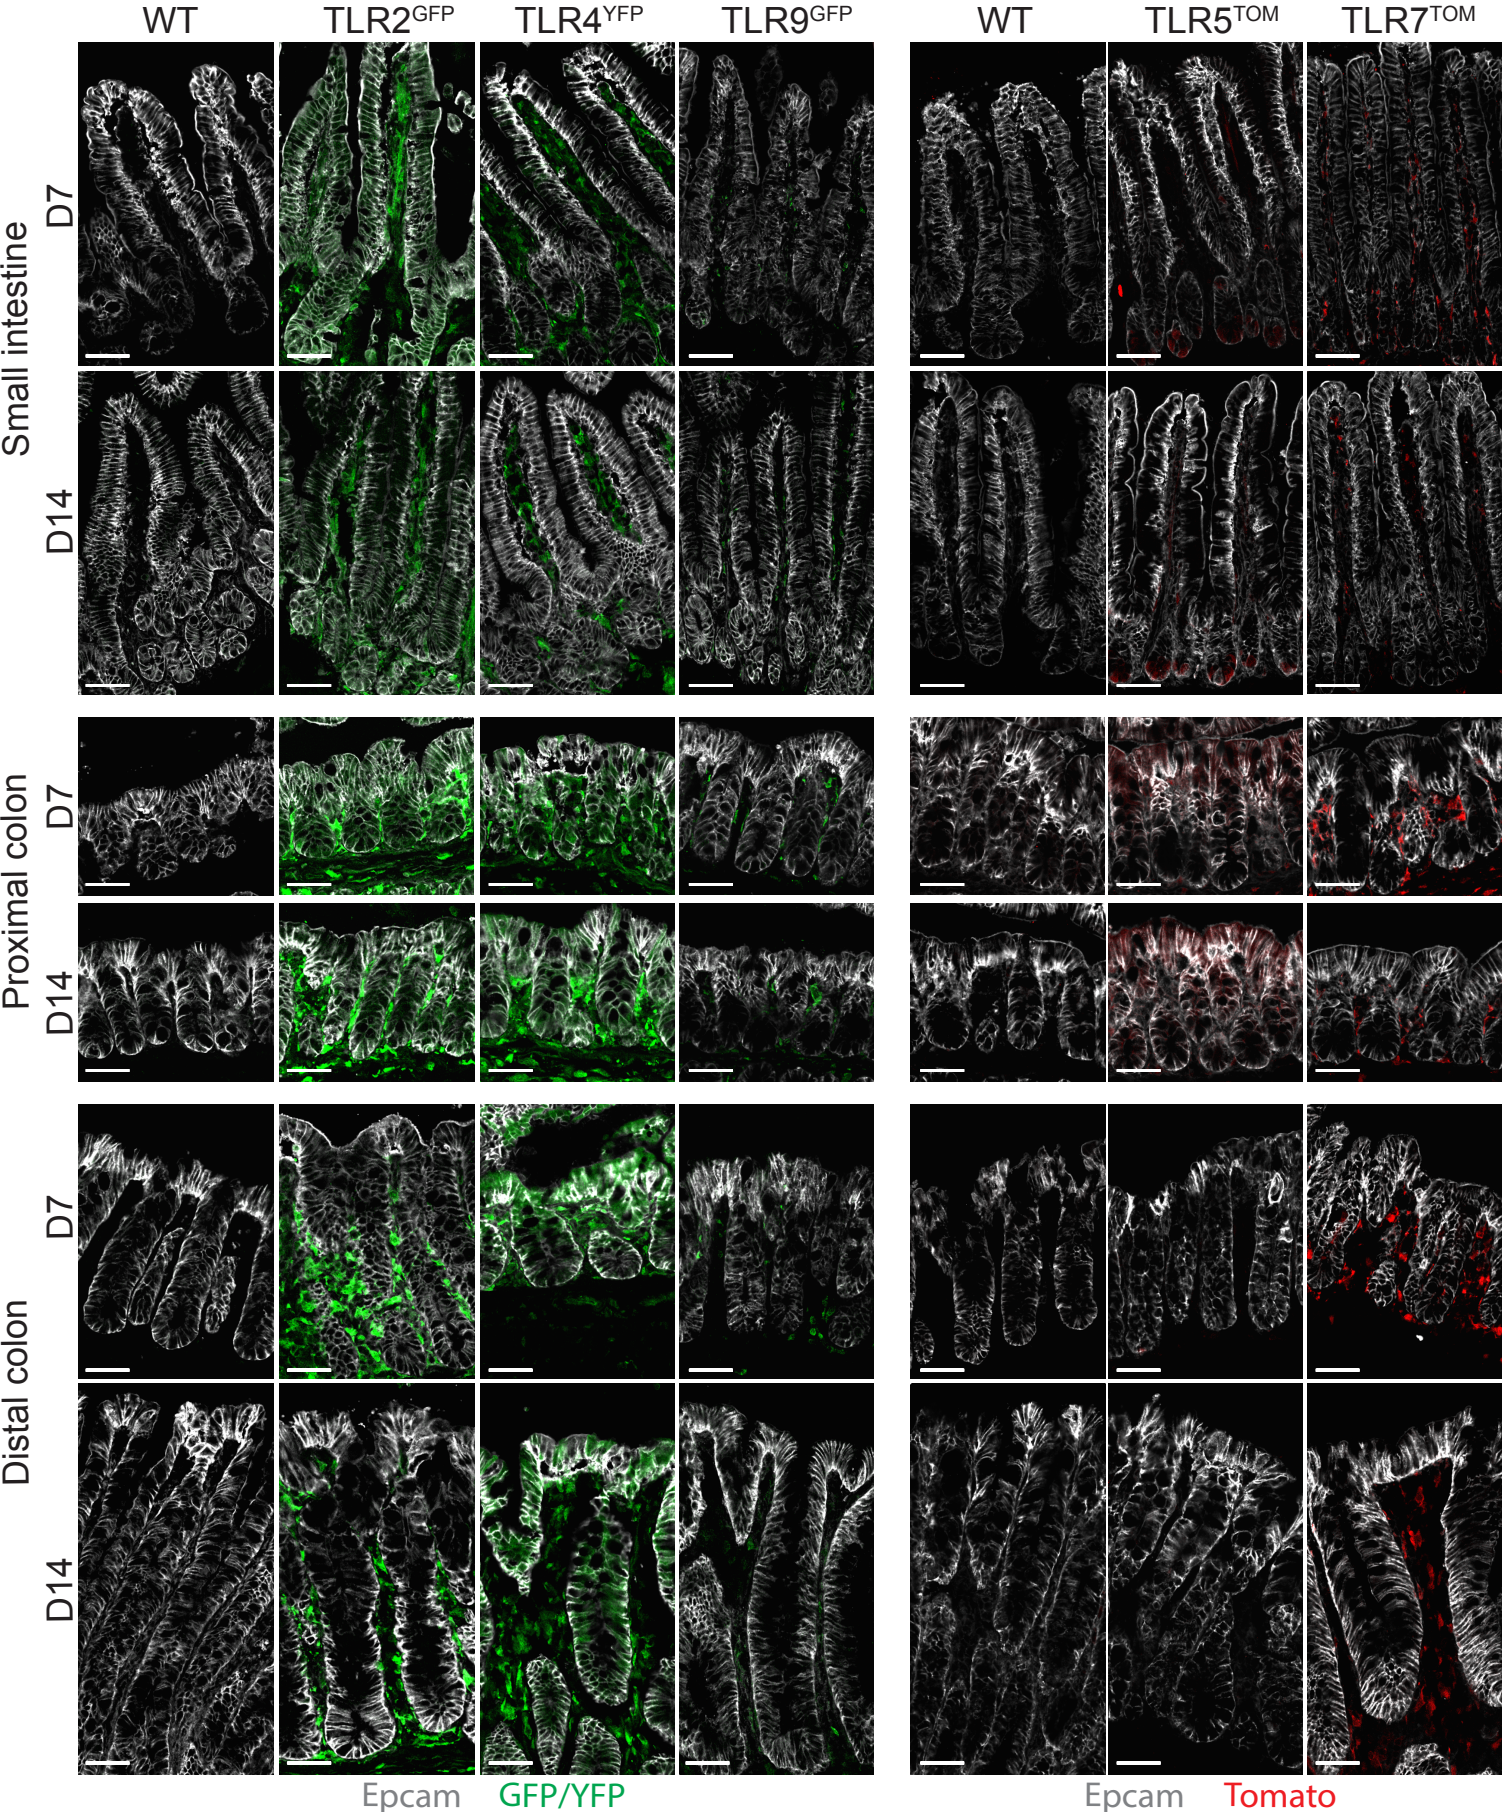



**Figure S3: TLR expression is not altered during DSS-induced colitis, (Related to Figure 1).**

Immunostaining of Epcam (epithelial cells) and GFP/YFP or tomato (TLR reporters) in SI and colon sections from indicated TLR reporter mice and WT controls that received DSS in the drinking water for 7 days. Time points at 7 days and 14 days are shown. SI images are localized to the ileum. Images were taken at 20x and exposures were set using staining of WT sections. Images are representative of 2 independent experiments each including 2-4 mice per genotype. Scale bars are 50 microns.



Figure S4

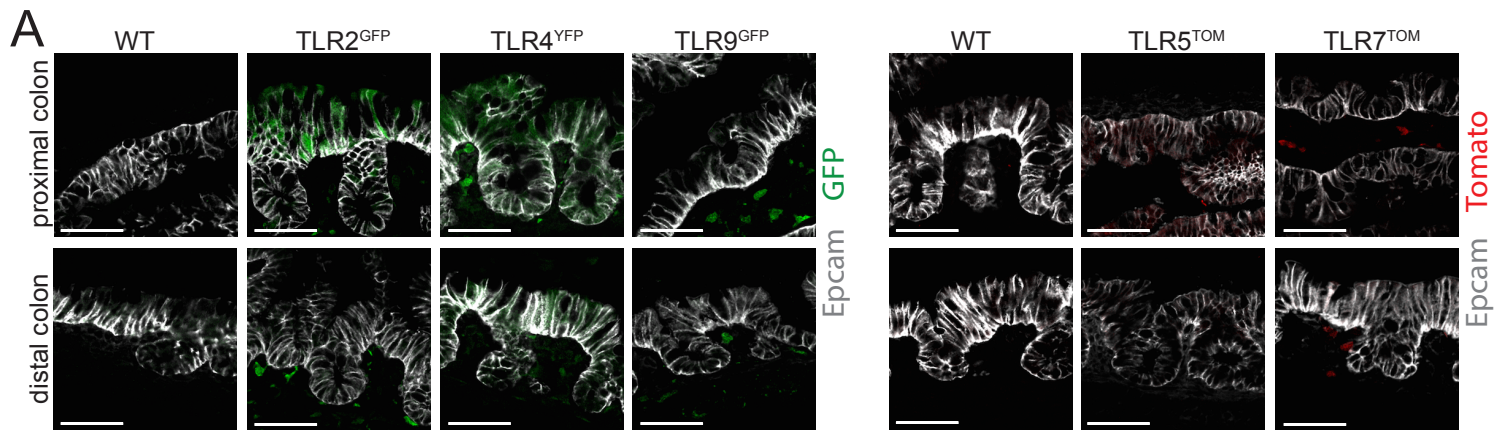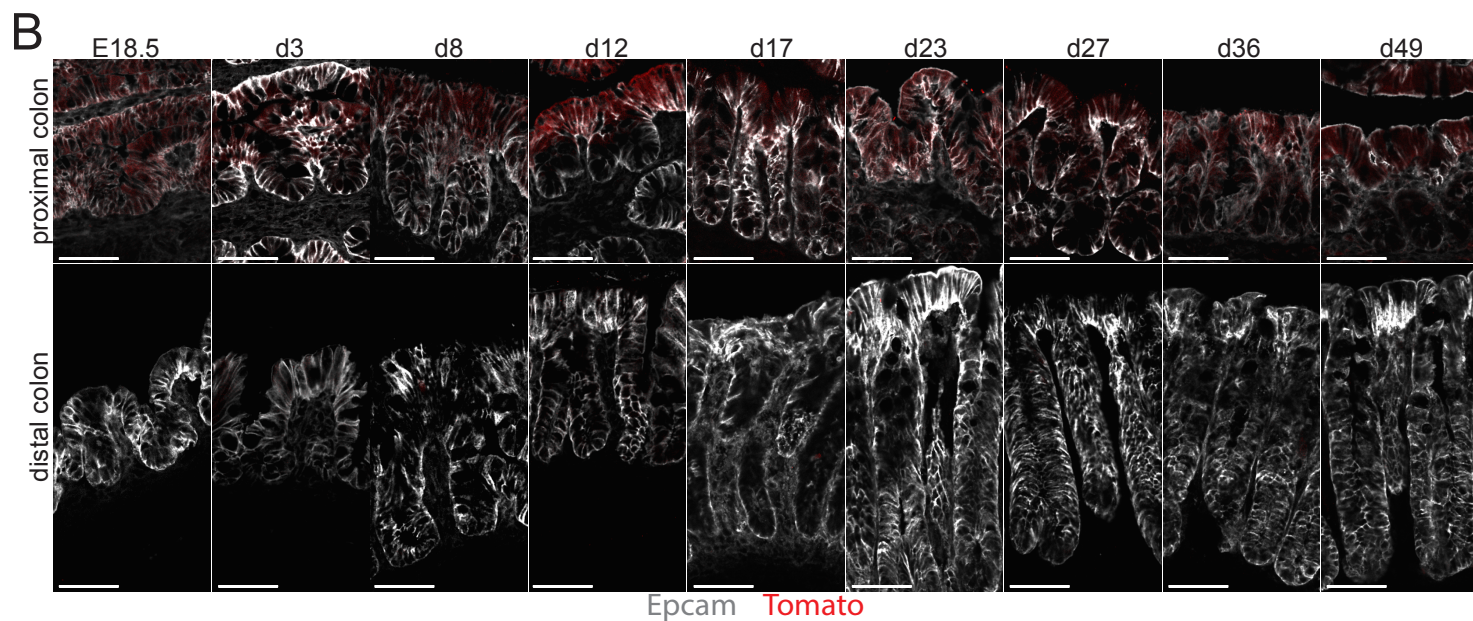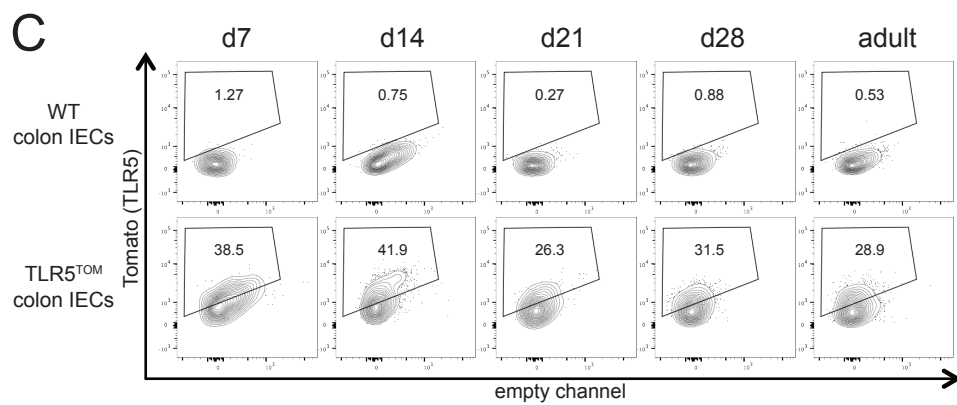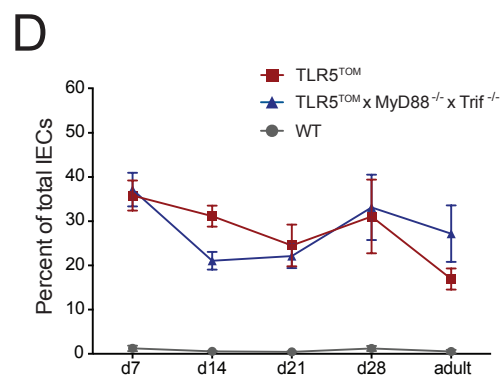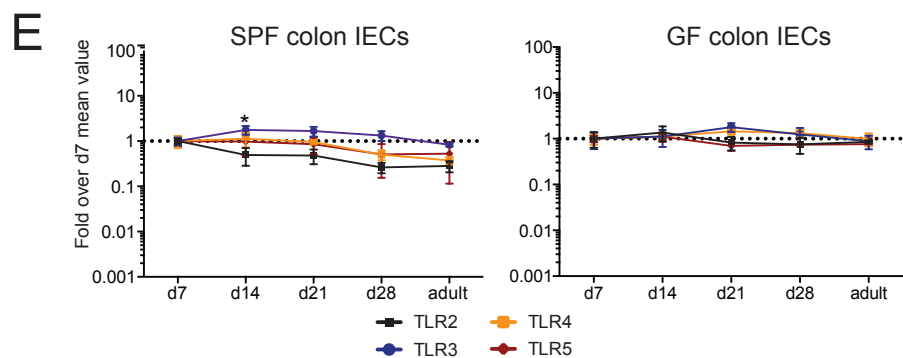

**Figure S4: TLR5 expression remains relatively constant in colon IECs, (Related to Figure 3).**

(A) Colon sections from d1 WT and TLR reporter mice were stained with antibodies to Epcam (epithelial cells) and GFP/YFP or tomato (TLR reporters). Images were taken at 20x and exposures were set using staining of WT colon sections. Data are representative of 2 independent experiments, each including 2-5 mice of each genotype. Scale bars are 50 microns.

(B) Staining of TLR5<sup>TOM</sup> proximal and distal colon sections with antibodies to Epcam (epithelial cells) and GFP/YFP or tomato (TLR reporters) at various time points after birth. Data are representative of 2 independent experiments, each including 1-3 mice per time point. Scale bars are 50 microns.

(C) Tomato fluorescence from total IECs isolated from WT or TLR5<sup>TOM</sup> colons at the indicated time points assessed using flow cytometry. Data are representative of 3 independent experiments, each including 2-5 mice of each genotype.

(D) The percentage of tomato<sup>+</sup> colon IECs from indicated mice beginning one week after birth, quantified by flow cytometry. Results are pooled from 2-3 independent experiments and each time point includes mice from at least two separate litters. Error bars are mean +/- SEM.

(E) IECs were isolated from the colons of WT mouse from our colony (SPF) and WT mice housed in germ-free isolators (GF) and quantitative RT-PCR was performed to measure TLR expression over time. Values are normalized to expression of beta actin and then expressed as fold over the expression observed in IECs collected at day 7. For SPF mice, data represent 4 mice per time point and the experiment was repeated 2 times. For GF mice, results from 2 separate experiments were pooled to generate results. Error bars are mean +/- SD. Stars denote significant differences between expression values at a particular time point compared to the value at day 7. Significance was calculated using one-way ANOVA. All points without stars are not significant. \*  $p \leq 0.05$ .





Figure S6

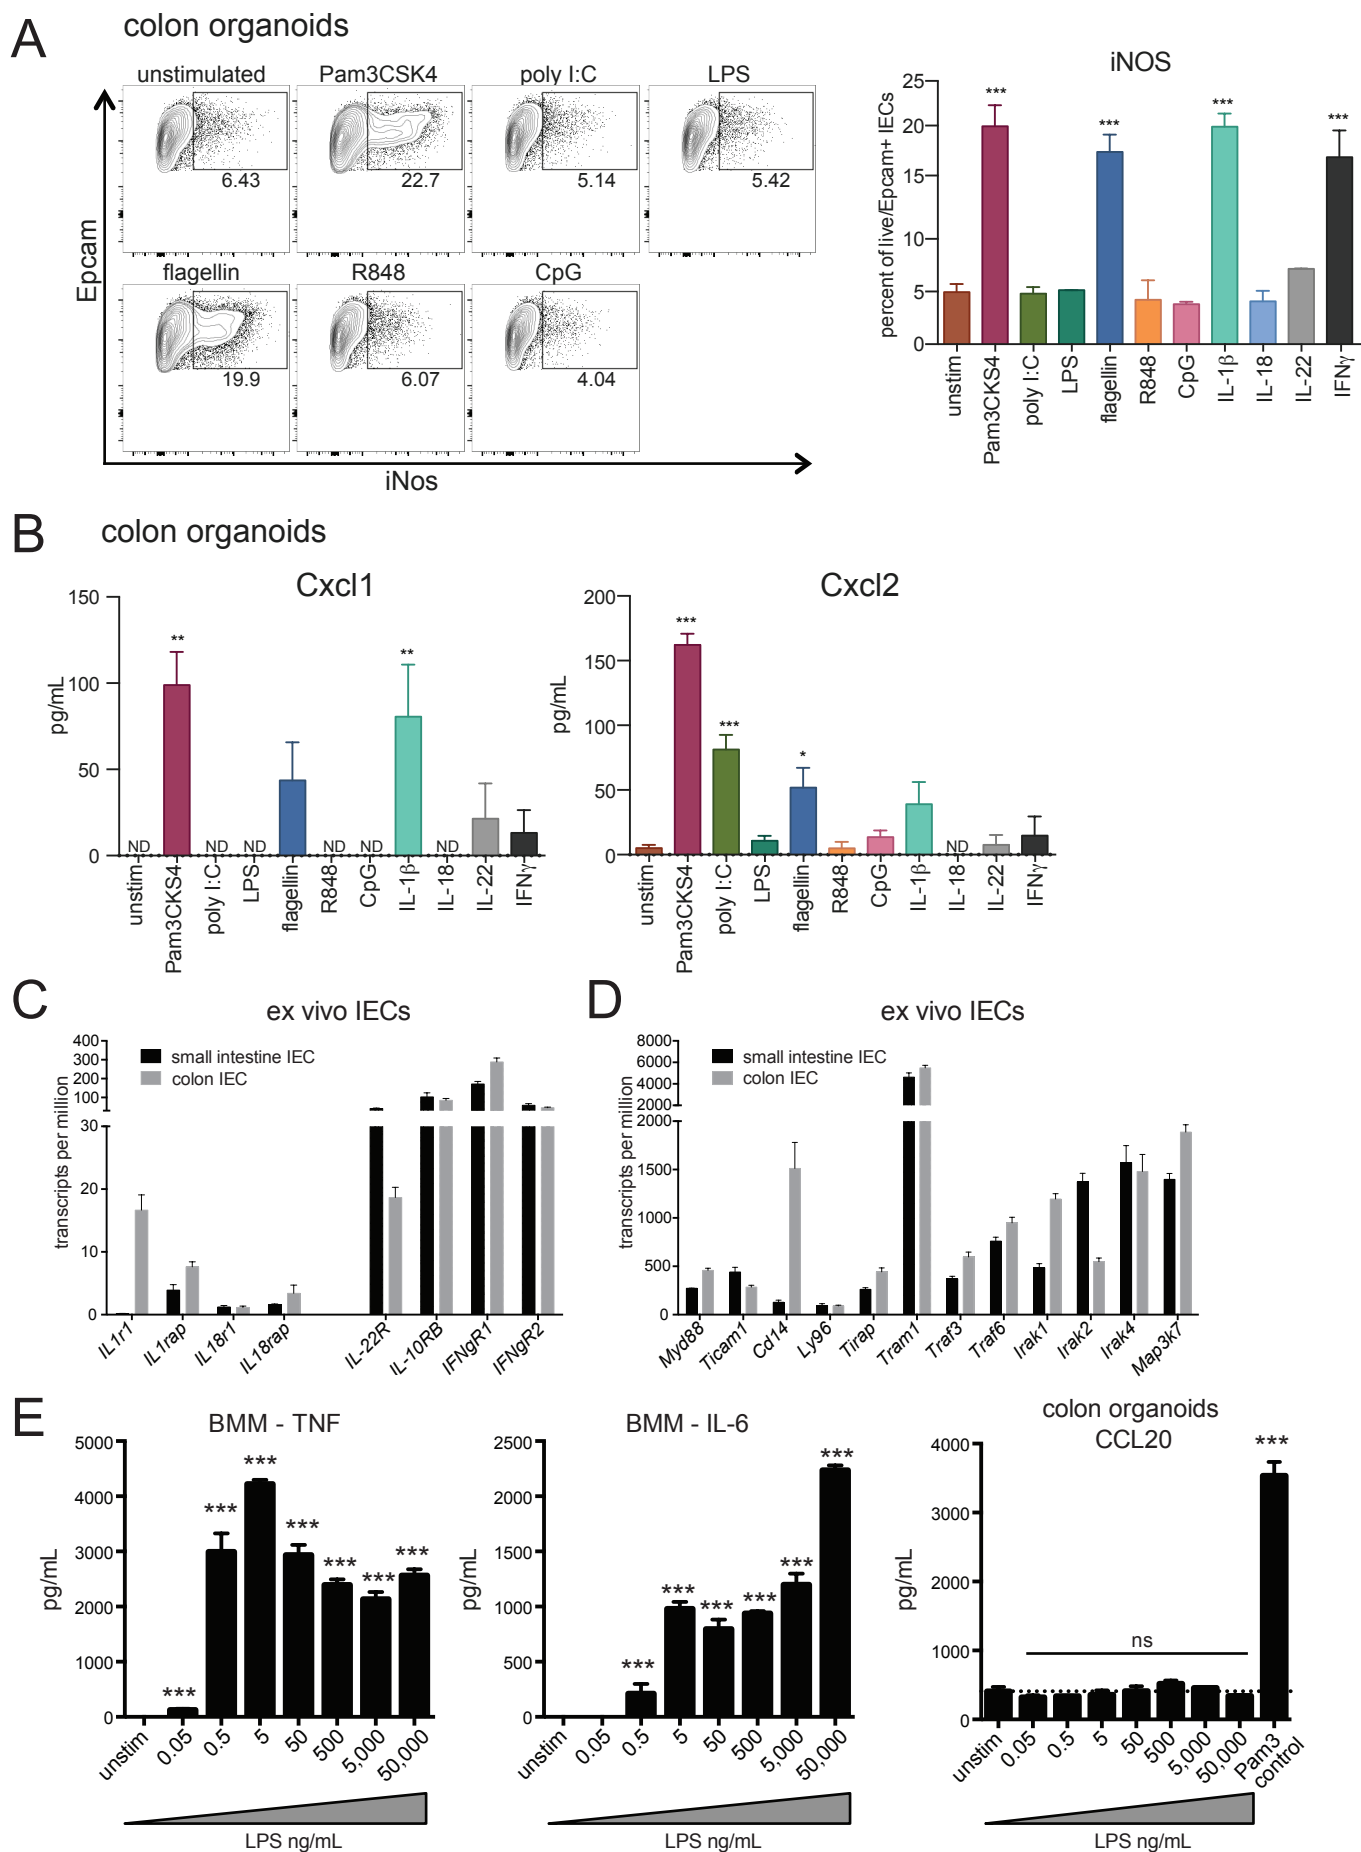

**Figure S6: Confirmation of TLR-induced genes, (Related to Figure 6).**

- (A) Flow cytometry of colon organoids stimulated with the indicated ligands using intracellular staining for iNOS. Right panel shows percentages of iNOS-positive cells. Experiment included 3 replicates for each stimulation condition and experiment was repeated twice. Significance was determined by comparing to unstimulated condition using one-way ANOVA. Error bars are mean +/- SEM. \*  $p \leq 0.05$ , \*\*  $p \leq .01$ , \*\*\*  $p \leq 0.001$ .
- (B) Cxcl1 and Cxcl2 levels measured by ELISA in supernatants of organoids stimulated with indicated ligands or cytokines for 16 hours. Experiment was repeated at least twice. Significance was determined by comparing to unstimulated condition using one-way ANOVA. ND indicates not detected. Error bars are mean +/- SEM. \*  $p \leq 0.05$ , \*\*  $p \leq .01$ , \*\*\*  $p \leq 0.001$ .
- (C) RNA-sequencing results for indicated cytokine receptor subunits obtained from *ex vivo* IECs.
- (D) RNA-sequencing results for indicated TLR signaling components obtained from *ex vivo* IECs. For C-D, IECs were isolated from 4 WT mice from 2 independent litters. Results are transcripts per million. Error bars are mean +/- SEM.
- (E) Bone marrow-derived macrophages or colon organoids were stimulated with indicated concentrations of LPS for 16 hours and supernatants were assayed for IL-6 and TNF using cytokine bead array. Ccl20 levels were measured using ELISA. Organoids were stimulated with Pam3CSK4 as a positive control for Ccl20 production. Error bars are mean +/- SEM.

Figure S7

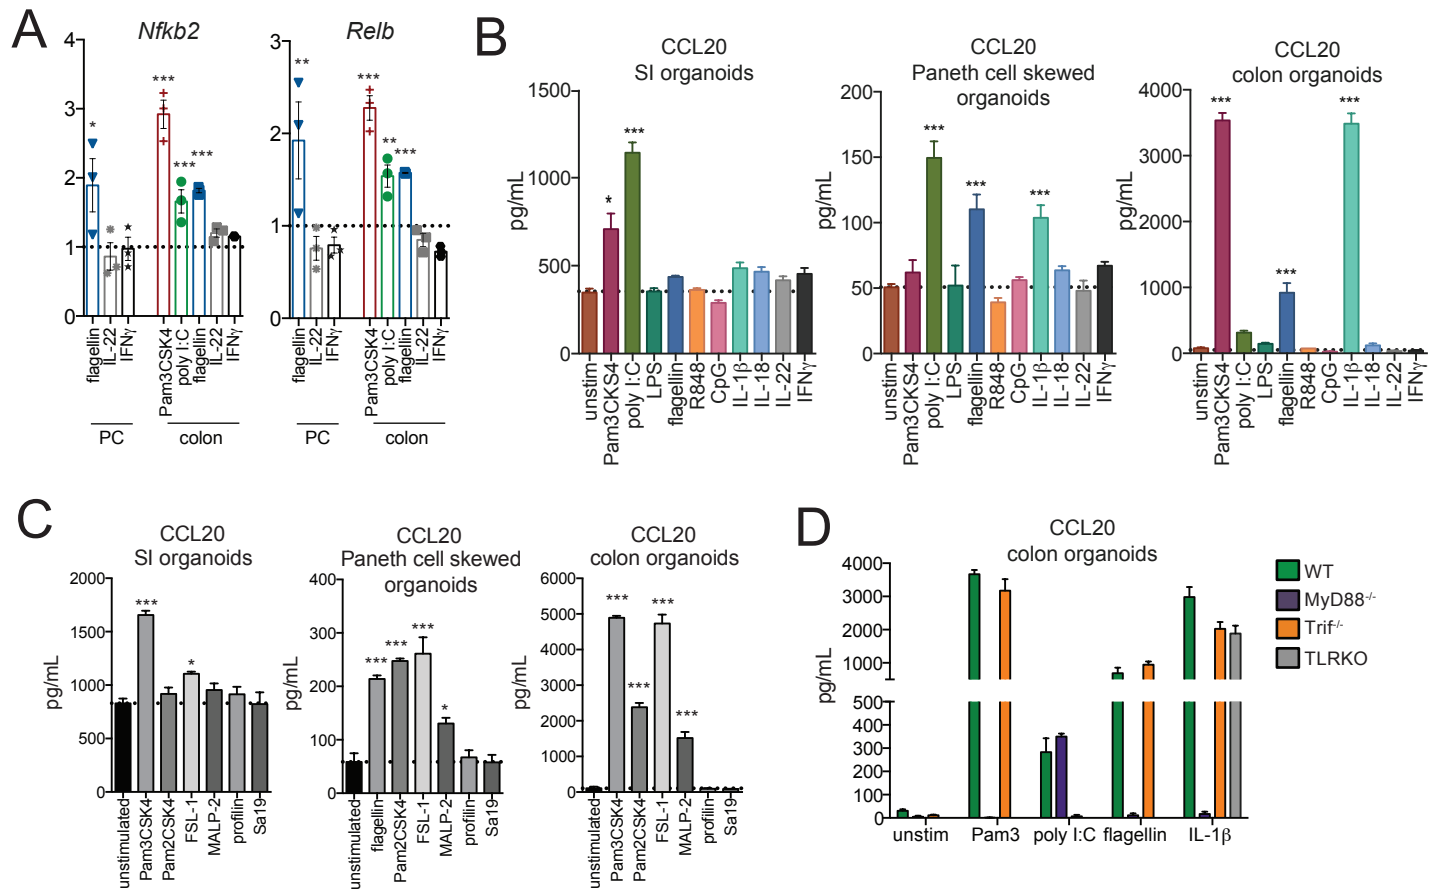

**Figure S7: Characterization of the TLR-induced gene program, (Related to Figure 6).**

(A) Fold induction of genes significantly induced by TLR ligands but not by IL-22 or IFN $\gamma$ . TLR ligands that induced the strongest responses in Paneth cell skewed and colon organoids are shown. Each point represents an independent experiment. Error bars are mean  $\pm$  SEM. Significance was determined by comparing to unstimulated condition using one-way ANOVA. \* p  $\leq$  0.05, \*\* p  $\leq$  .01, \*\*\* p  $\leq$  0.001.

(B) *Ccl20* levels measured by ELISA in supernatants of organoids stimulated with indicated ligands or cytokines for 16 hours. Significance was determined by comparing to unstimulated condition using one-way ANOVA \* p  $\leq$  0.05, \*\* p  $\leq$  .01, \*\*\* p  $\leq$  0.001.

(C) *Ccl20* levels measured by ELISA in supernatants of organoids stimulated with indicated ligands or cytokines for 16 hours. Significance was determined by comparing to unstimulated condition using one-way ANOVA \* p  $\leq$  0.05, \*\* p  $\leq$  .01, \*\*\* p  $\leq$  0.001.

(D) *Ccl20* levels measured by ELISA in supernatants of organoids generated from WT, MyD88<sup>-/-</sup>Trif<sup>-/-</sup>, or TLRKO (TLR2<sup>-/-</sup>TLR4<sup>-/-</sup>Unc93b<sup>3d/3d</sup>) mice stimulated with the indicated ligands or cytokines for 16 hours. For E-H, results are representative of at least 2 independent experiments. Error bars are mean  $\pm$  SEM.



# Table S1

| Short name          | Long name                     | epitope tag | fluorescent protein | expression in SI IECs                                                                                    | expression in colon IECs                                           | TLR localization in proximal colon     |
|---------------------|-------------------------------|-------------|---------------------|----------------------------------------------------------------------------------------------------------|--------------------------------------------------------------------|----------------------------------------|
| TLR2 <sup>GFP</sup> | TLR2 <sup>HA:GFP</sup>        | HA          | GFP                 | low level of expression throughout                                                                       | strong expression in proximal colon, no expression in distal colon | apical and basolateral                 |
| TLR4 <sup>YFP</sup> | TLR4 <sup>HA:YFP</sup>        | HA          | YFP                 | low level of expression in patches                                                                       | strong expression in proximal and distal colon                     | apical, basolateral, and intracellular |
| TLR5 <sup>TOM</sup> | TLR5 <sup>HA:tdTomato</sup>   | HA          | tdTomato            | expression in Paneth cells in crypts, increased expression moving from proximal to distal sections of SI | strong expression in proximal colon, no expression in distal colon | apical and basolateral                 |
| TLR7 <sup>TOM</sup> | TLR7 <sup>Flag:tdTomato</sup> | FLAG        | tdTomato            | no expression                                                                                            | no expression                                                      | not determined                         |
| TLR9 <sup>GFP</sup> | TLR9 <sup>HA:GFP</sup>        | HA          | GFP                 | no expression                                                                                            | no expression                                                      | not detected                           |

**Table S1: TLR reporter mouse strains used in this study, (Related to Figure 1).**  
 Features and expression patterns of TLR reporter mice characterized in this study.

# Table S2

|                                       | small intestine |                 |            |                  |             |            |       |       |       |       | Paneth cell skewed |                 |            |                  |             |            |       |       |       |       | colon           |                 |            |                  |             |            |       |       |       |       |  |  |
|---------------------------------------|-----------------|-----------------|------------|------------------|-------------|------------|-------|-------|-------|-------|--------------------|-----------------|------------|------------------|-------------|------------|-------|-------|-------|-------|-----------------|-----------------|------------|------------------|-------------|------------|-------|-------|-------|-------|--|--|
|                                       | Pam3CSK4 (TLR2) | poly I:C (TLR3) | LPS (TLR4) | flagellin (TLR5) | R848 (TLR7) | CpG (TLR9) | IL-1β | IL-18 | IL-22 | IFNγ  | Pam3CSK4 (TLR2)    | poly I:C (TLR3) | LPS (TLR4) | flagellin (TLR5) | R848 (TLR7) | CpG (TLR9) | IL-1β | IL-18 | IL-22 | IFNγ  | Pam3CSK4 (TLR2) | poly I:C (TLR3) | LPS (TLR4) | flagellin (TLR5) | R848 (TLR7) | CpG (TLR9) | IL-1β | IL-18 | IL-22 | IFNγ  |  |  |
| <b>CHEMOKINES</b>                     |                 |                 |            |                  |             |            |       |       |       |       |                    |                 |            |                  |             |            |       |       |       |       |                 |                 |            |                  |             |            |       |       |       |       |  |  |
| <i>Ccl20</i>                          | 1.8             | 2.7             | 0.9        | 1.2              | 1.0         | 1.0        | 1.1   | 1.2   | 0.7   | 0.4   | 1.9                | 2.6             | 1.4        | 5.9              | 1.1         | 1.6        | 1.8   | 0.9   | 0.9   | 0.6   | 490.2           | 12.4            | 3.5        | 72.4             | 1.7         | 2.7        | 204.1 | 1.2   | 0.5   | 0.1   |  |  |
| <i>Ccl28</i>                          | 1.0             | 0.9             | 1.0        | 0.9              | 0.7         | 0.8        | 0.9   | 0.8   | 0.7   | 0.3   | 0.3                | 1.6             | 1.2        | 2.3              | 0.6         | 0.8        | 1.2   | 1.1   | 0.2   | 0.2   | 1.5             | 1.0             | 1.0        | 1.4              | 0.8         | 0.9        | 1.5   | 0.9   | 0.5   | 0.3   |  |  |
| <i>Ccl9</i>                           | 1.3             | 1.2             | 1.2        | 1.5              | 1.0         | 1.3        | 1.2   | 1.2   | 1.0   | 0.8   | 1.3                | 1.6             | 1.6        | 1.8              | 1.3         | 1.8        | 1.6   | 1.7   | 0.7   | 0.8   | 1.6             | 1.3             | 1.2        | 1.5              | 1.0         | 1.3        | 1.6   | 1.1   | 1.2   | 1.3   |  |  |
| <i>Cxcl1</i>                          | 1.0             | 1.0             | 1.0        | 1.1              | 1.0         | 1.0        | 1.0   | 1.0   | 1.3   | 1.2   | 1.2                | 1.2             | 1.2        | 1.3              | 1.2         | 1.3        | 1.4   | 1.2   | 0.9   | 1.2   | 69.6            | 1.0             | 1.0        | 2.2              | 1.1         | 1.0        | 26.2  | 1.0   | 10.5  | 4.4   |  |  |
| <i>Cxcl10</i>                         | 0.9             | 2.8             | 0.9        | 0.9              | 0.9         | 0.9        | 1.1   | 1.0   | 0.7   | 67.4  | 0.8                | 23.0            | 0.6        | 3.1              | 1.2         | 0.9        | 1.7   | 1.4   | 0.5   | 935.3 | 5.8             | 18.1            | 1.2        | 1.8              | 1.0         | 1.2        | 2.8   | 1.0   | 0.8   | 219.3 |  |  |
| <i>Cxcl16</i>                         | 1.2             | 1.1             | 1.0        | 1.1              | 1.0         | 1.1        | 0.9   | 0.9   | 1.1   | 1.1   | 1.3                | 1.4             | 1.5        | 2.1              | 1.4         | 1.7        | 1.7   | 1.7   | 1.3   | 1.8   | 2.3             | 1.0             | 1.0        | 1.5              | 0.9         | 1.1        | 1.8   | 1.0   | 0.7   | 0.9   |  |  |
| <i>Cxcl2</i>                          | 0.8             | 1.0             | 0.7        | 0.9              | 0.9         | 0.4        | 0.3   | 0.5   | 3.9   | 3.9   | 0.8                | 0.9             | 1.2        | 1.5              | 0.9         | 0.9        | 1.8   | 1.0   | 0.9   | 0.7   | 20.5            | 0.8             | 1.4        | 7.3              | 1.8         | 1.6        | 9.1   | 1.0   | 1.1   | 1.2   |  |  |
| <b>CYTOKINES</b>                      |                 |                 |            |                  |             |            |       |       |       |       |                    |                 |            |                  |             |            |       |       |       |       |                 |                 |            |                  |             |            |       |       |       |       |  |  |
| <i>Csf1</i>                           | 1.4             | 1.1             | 0.9        | 1.0              | 0.8         | 1.1        | 1.0   | 0.8   | 2.5   | 6.2   | 1.0                | 1.0             | 1.0        | 1.2              | 0.8         | 0.9        | 1.6   | 1.0   | 0.7   | 1.5   | 20.1            | 2.2             | 2.7        | 7.8              | 1.5         | 1.8        | 14.5  | 1.6   | 1.8   | 11.0  |  |  |
| <i>Il10</i>                           | 1.0             | 1.0             | 1.0        | 1.1              | 1.0         | 1.0        | 1.0   | 1.0   | 1.3   | 1.2   | 1.2                | 1.2             | 1.2        | 1.1              | 1.2         | 1.3        | 1.4   | 1.2   | 0.9   | 1.2   | 1.0             | 1.0             | 1.0        | 1.0              | 1.1         | 1.0        | 1.0   | 1.0   | 1.0   | 1.2   |  |  |
| <i>Il18</i>                           | 1.2             | 1.2             | 1.2        | 1.2              | 1.1         | 1.2        | 1.1   | 1.2   | 2.3   | 1.0   | 1.2                | 1.4             | 1.1        | 1.3              | 1.3         | 2.0        | 1.5   | 1.6   | 0.8   | 1.2   | 1.0             | 1.2             | 1.2        | 1.0              | 1.1         | 1.2        | 1.0   | 1.1   | 1.7   | 0.8   |  |  |
| <i>Il1a</i>                           | 1.1             | 1.8             | 1.8        | 1.6              | 1.3         | 1.7        | 1.4   | 1.0   | 8.6   | 13.4  | 1.3                | 1.3             | 1.4        | 1.5              | 1.1         | 1.2        | 1.4   | 1.1   | 0.7   | 0.4   | 0.6             | 0.5             | 1.0        | 1.5              | 0.4         | 0.3        | 0.6   | 0.4   | 0.3   | 1.1   |  |  |
| <i>Il1b</i>                           | 0.7             | 0.7             | 1.1        | 0.9              | 0.6         | 0.7        | 0.4   | 0.6   | 3.1   | 2.1   | 1.2                | 1.2             | 1.3        | 1.4              | 0.8         | 1.1        | 1.3   | 1.1   | 0.9   | 1.0   | 1.2             | 1.6             | 2.0        | 1.6              | 1.3         | 2.2        | 2.1   | 1.9   | 1.5   | 0.8   |  |  |
| <i>Il6</i>                            | 1.9             | 2.0             | 2.3        | 2.4              | 1.8         | 1.9        | 1.0   | 0.7   | 24.0  | 18.8  | 1.0                | 1.4             | 1.1        | 1.0              | 0.8         | 1.3        | 1.2   | 1.0   | 1.2   | 1.0   | 3.4             | 2.5             | 5.1        | 3.5              | 1.9         | 3.3        | 3.1   | 1.6   | 0.8   | 0.9   |  |  |
| <i>Tgfb</i>                           | 1.3             | 1.1             | 1.3        | 1.3              | 0.8         | 1.2        | 1.1   | 1.3   | 0.9   | 0.9   | 1.1                | 1.5             | 1.4        | 2.7              | 1.1         | 1.4        | 1.9   | 1.3   | 0.5   | 0.5   | 1.9             | 1.0             | 1.1        | 1.6              | 1.0         | 1.1        | 2.1   | 0.9   | 0.8   | 0.9   |  |  |
| <i>Tnf</i>                            | 18.4            | 5.7             | 0.9        | 3.0              | 0.9         | 0.9        | 0.9   | 1.2   | 4.7   | 64.5  | 1.9                | 2.1             | 1.1        | 17.8             | 0.9         | 1.3        | 3.1   | 1.8   | 3.7   | 14.7  | 9.9             | 4.1             | 2.2        | 3.8              | 0.9         | 1.5        | 8.0   | 1.3   | 2.0   | 6.6   |  |  |
| <b>INNATE IMMUNITY</b>                |                 |                 |            |                  |             |            |       |       |       |       |                    |                 |            |                  |             |            |       |       |       |       |                 |                 |            |                  |             |            |       |       |       |       |  |  |
| <i>Casp4</i>                          | 1.5             | 1.4             | 1.4        | 1.5              | 1.2         | 1.2        | 1.1   | 1.0   | 2.6   | 5.0   | 1.2                | 1.4             | 1.6        | 3.9              | 1.2         | 1.7        | 2.2   | 1.5   | 2.6   | 8.5   | 2.8             | 1.5             | 1.2        | 2.1              | 1.0         | 1.3        | 2.5   | 1.0   | 1.8   | 4.6   |  |  |
| <i>Gbp6</i>                           | 1.0             | 1.0             | 1.0        | 1.1              | 1.0         | 1.0        | 1.0   | 1.0   | 1.3   | 864.3 | 1.2                | 1.2             | 1.2        | 1.5              | 1.2         | 1.3        | 5.8   | 1.5   | 0.9   | 1240  | 9.8             | 2.9             | 1.0        | 12.7             | 1.1         | 1.0        | 10.9  | 1.0   | 1.0   | 2778  |  |  |
| <i>Gbp9</i>                           | 0.7             | 0.7             | 1.1        | 0.9              | 0.5         | 0.7        | 0.3   | 0.6   | 8.1   | 8.0   | 0.8                | 1.2             | 1.1        | 0.9              | 1.1         | 1.1        | 1.0   | 1.2   | 10.0  | 6.1   | 0.8             | 3.9             | 6.2        | 0.6              | 1.2         | 2.8        | 1.4   | 0.9   | 121.7 |       |  |  |
| <i>Il22r</i>                          | 1.4             | 1.4             | 1.3        | 1.4              | 1.2         | 1.3        | 1.3   | 1.3   | 1.0   | 1.0   | 1.0                | 1.4             | 1.3        | 1.5              | 1.3         | 1.5        | 1.6   | 1.4   | 0.6   | 0.6   | 1.9             | 1.3             | 1.3        | 1.4              | 1.2         | 1.3        | 2.1   | 1.4   | 1.1   | 1.0   |  |  |
| <i>Lcn2</i>                           | 1.6             | 1.0             | 1.3        | 1.1              | 1.0         | 0.9        | 0.7   | 0.8   | 15.0  | 9.0   | 1.2                | 1.2             | 1.2        | 1.4              | 3.5         | 2.4        | 1.4   | 1.2   | 0.9   | 1.2   | 3.5             | 0.9             | 0.9        | 1.3              | 0.7         | 0.8        | 3.2   | 0.8   | 1.3   | 0.9   |  |  |
| <i>Nod2</i>                           | 0.9             | 0.9             | 0.9        | 0.9              | 0.9         | 0.9        | 0.9   | 1.1   | 3.0   | 3.0   | 1.2                | 1.2             | 2.1        | 1.1              | 1.2         | 3.0        | 1.4   | 1.2   | 0.9   | 11.9  | 57.5            | 4.0             | 4.3        | 18.2             | 1.1         | 1.8        | 56.6  | 1.7   | 1.0   | 12.9  |  |  |
| <i>Pigr</i>                           | 1.1             | 1.1             | 1.1        | 1.1              | 1.0         | 1.0        | 1.0   | 0.9   | 1.0   | 0.8   | 1.0                | 1.2             | 1.2        | 1.7              | 1.1         | 1.2        | 1.4   | 1.2   | 1.1   | 1.3   | 1.2             | 1.1             | 1.1        | 1.2              | 1.0         | 1.1        | 1.3   | 1.0   | 0.9   | 0.8   |  |  |
| <i>Tlr2</i>                           | 1.7             | 1.0             | 1.0        | 1.1              | 1.0         | 2.6        | 1.0   | 1.0   | 1.3   | 1.2   | 3.2                | 1.2             | 1.2        | 8.7              | 1.2         | 1.8        | 2.3   | 2.8   | 0.9   | 1.2   | 9.2             | 1.5             | 1.4        | 2.5              | 1.2         | 1.3        | 4.8   | 1.3   | 1.4   | 1.6   |  |  |
| <b>CELL DEATH AND SURVIVAL</b>        |                 |                 |            |                  |             |            |       |       |       |       |                    |                 |            |                  |             |            |       |       |       |       |                 |                 |            |                  |             |            |       |       |       |       |  |  |
| <i>Bid</i>                            | 1.3             | 1.3             | 1.3        | 1.3              | 1.2         | 1.2        | 1.1   | 1.1   | 1.2   | 2.2   | 0.9                | 1.4             | 1.5        | 1.7              | 1.3         | 1.3        | 1.6   | 1.5   | 1.0   | 2.9   | 2.5             | 1.3             | 1.3        | 1.7              | 1.2         | 1.3        | 2.4   | 1.2   | 1.1   | 3.1   |  |  |
| <i>Birc3</i>                          | 1.2             | 1.3             | 1.1        | 1.2              | 1.1         | 1.1        | 1.1   | 1.1   | 1.0   | 1.0   | 1.1                | 1.6             | 1.4        | 4.2              | 1.4         | 1.3        | 2.5   | 1.3   | 1.4   | 1.6   | 2.8             | 1.6             | 1.2        | 1.8              | 1.1         | 1.1        | 2.8   | 1.2   | 1.1   | 1.1   |  |  |
| <i>Bok</i>                            | 1.2             | 1.3             | 1.3        | 1.2              | 1.1         | 1.3        | 1.0   | 1.0   | 2.8   | 2.9   | 1.3                | 1.5             | 1.3        | 1.9              | 1.2         | 1.3        | 2.0   | 1.3   | 1.5   | 1.5   | 1.6             | 1.1             | 1.1        | 1.4              | 1.1         | 1.3        | 1.6   | 1.1   | 1.4   | 1.5   |  |  |
| <i>Gsdmd</i>                          | 1.2             | 1.2             | 1.1        | 1.2              | 1.2         | 1.2        | 1.1   | 1.2   | 2.9   | 3.0   | 1.1                | 1.2             | 1.2        | 1.6              | 1.1         | 1.2        | 1.4   | 1.2   | 1.3   | 1.9   | 1.6             | 1.1             | 1.0        | 1.4              | 1.1         | 1.1        | 1.7   | 1.1   | 1.4   | 1.8   |  |  |
| <b>NF-KB SIGNALING AND INHIBITION</b> |                 |                 |            |                  |             |            |       |       |       |       |                    |                 |            |                  |             |            |       |       |       |       |                 |                 |            |                  |             |            |       |       |       |       |  |  |
| <i>Bcl3</i>                           | 1.2             | 1.3             | 1.1        | 1.1              | 0.9         | 1.2        | 0.8   | 0.9   | 3.2   | 4.4   | 1.1                | 1.2             | 1.2        | 1.2              | 1.1         | 1.2        | 1.5   | 1.2   | 1.7   | 1.6   | 2.2             | 1.5             | 1.2        | 1.4              | 1.1         | 1.1        | 2.0   | 1.2   | 2.9   | 3.8   |  |  |
| <i>Nfkb1</i>                          | 1.1             | 1.2             | 1.2        | 1.1              | 1.1         | 1.1        | 1.1   | 1.0   | 1.0   | 1.0   | 0.9                | 1.4             | 1.2        | 1.3              | 1.2         | 1.2        | 1.5   | 1.3   | 1.0   | 1.3   | 1.4             | 1.3             | 1.2        | 1.3              | 1.1         | 1.2        | 1.4   | 1.1   | 1.0   | 1.3   |  |  |
| <i>Nfkb2</i>                          | 1.2             | 1.4             | 1.1        | 1.2              | 0.9         | 1.0        | 1.0   | 0.9   | 1.5   | 1.4   | 1.0                | 1.3             | 1.2        | 1.9              | 1.0         | 1.2        | 1.6   | 1.1   | 0.9   | 1.0   | 2.9             | 1.7             | 1.3        | 1.8              | 0.9         | 1.3        | 2.5   | 1.2   | 1.2   | 1.2   |  |  |
| <i>Nfkbia</i>                         | 1.3             | 1.4             | 0.9        | 1.0              | 0.9         | 1.0        | 1.0   | 1.0   | 1.5   | 0.9   | 1.3                | 1.6             | 1.3        | 2.0              | 1.1         | 1.5        | 1.8   | 1.4   | 1.1   | 1.2   | 3.9             | 1.8             | 1.1        | 1.6              | 0.9         | 1.0        | 2.6   | 0.9   | 1.2   | 1.4   |  |  |
| <i>Relb</i>                           | 1.2             | 1.3             | 1.0        | 1.1              | 1.0         | 1.1        | 1.0   | 1.0   | 0.9   | 0.6   | 1.1                | 1.3             | 1.0        | 1.9              | 1.0         | 1.1        | 1.6   | 1.0   | 0.8   | 0.8   | 2.3             | 1.5             | 1.2        | 1.6              | 1.0         | 1.2        | 2.1   | 1.2   | 0.8   | 0.7   |  |  |
| <i>Tnfaip3</i>                        | 1.8             | 2.1             | 1.2        | 1.5              | 1.1         | 1.3        | 1.2   | 1.2   | 1.3   | 2.5   | 1.2                | 2.2             | 1.9        | 3.7              | 1.3         | 1.6        | 2.6   | 1.5   | 1.2   | 1.2   | 5.5             | 2.9             | 1.5        | 2.3              | 1.1         | 1.3        | 4.0   | 1.2   | 1.1   | 2.3   |  |  |
| <i>Tnfp3</i>                          | 0.9             | 1.1             | 1.1        | 1.1              | 0.9         | 1.0        | 1.0   | 0.9   | 0.7   | 0.6   | 3.2                | 5.6             | 8.4        | 7.1              | 4.9         | 2.4        | 1.8   | 1.2   | 3.1   | 6.6   | 2.8             | 1.5             | 1.2        | 1.8              | 1.0         | 1.1        | 2.3   | 1.0   | 1.7   | 1.7   |  |  |
| <b>REACTIVE OXYGEN AND NITROGEN</b>   |                 |                 |            |                  |             |            |       |       |       |       |                    |                 |            |                  |             |            |       |       |       |       |                 |                 |            |                  |             |            |       |       |       |       |  |  |
| <i>Cyba</i>                           | 1.2             | 1.1             | 1.2        | 1.1              | 1.0         | 1.2        | 0.9   | 0.9   | 0.8   | 0.8   | 1.2                | 1.3             | 1.2        | 3.8              | 1.1         | 1.1        | 1.7   | 1.2   | 0.7   | 0.8   | 2.2             | 1.3             | 1.1        | 1.7              | 1.1         | 1.2        | 2.2   | 1.2   | 1.0   | 1.0   |  |  |
| <i>Duox1</i>                          | 0.9             | 1.1             | 1.0        | 0.9              | 0.9         | 1.2        | 1.0   | 1.0   | 0.8   | 0.8   | 0.8                | 1.1             | 1.8        | 1.5              | 0.8         | 0.9        | 1.6   | 0.6   | 1.4   | 0.7   | 0.9             | 1.0             | 1.1        | 0.9              | 1.0         | 1.0        | 1.1   | 1.0   | 0.9   |       |  |  |
| <i>Duox2</i>                          | 1.6             | 1.1             | 0.9        | 1.4              | 1.2         | 1.1        | 1.2   | 1.2   | 10.0  | 35.1  | 1.1                | 1.2             | 1.4        | 5.3              | 1.2         | 1.3        | 5.8   | 1.5   | 1.8   | 2.8   | 20.0            | 1.4             | 1.6        | 10.6             | 1.2         | 1.2        | 28.2  | 1.4   | 3.7   | 5.3   |  |  |
| <i>Duoxa1</i>                         | 1.3             | 3.2             | 4.1        | 2.3              | 1.0         | 1.4        | 0.5   | 1.7   | 29.2  | 21.0  | 0.5                | 0.4             | 0.7        | 0.7              | 0.6         | 0.9        | 0.5   | 0.7   | 1.0   | 0.4   | 1.3             | 1.4             | 0.7        | 1.3              | 1.8         | 1.7        | 2.0   | 1.8   | 0.8   | 0.6   |  |  |
| <i>Duoxa2</i>                         | 1.7             | 1.3             | 1.4        | 1.6              | 1.2         | 1.3        | 1.3   | 1.3   | 10.0  | 48.1  | 1.2                | 1.3             | 1.7        | 4.1              | 1.3         | 1.6        | 1.8   | 1.7   | 1.5   | 2.8   | 29.3            | 1.0             | 1.4        | 10.8             | 1.1         | 1.2        | 22.6  | 1.0   | 2.9   | 6.6   |  |  |
| <i>Nos2</i>                           | 2.5             | 1.4             | 1.1        | 1.7              | 0.6         | 1.0        | 1.1   | 1.1   | 8.8   | 26.7  | 1.5                | 0.9             | 1.4        | 4.2              | 0.7         | 1.0        | 2.2   | 1.1   | 1.4   | 2.5   | 46.6            | 2.7             | 1.6        | 10.9             | 1.2         | 1.3        | 32.5  | 1.4   | 4.5   | 19.5  |  |  |
| <i>Nox1</i>                           | 4.1             | 1.1             | 0.9        | 1.1              | 0.9         | 1.0        | 1.2   | 1.4   | 1.5   | 1.4   | 1.2                | 1.5             | 1.6        | 1.5              | 1.3         | 1.7        | 1.6   | 1.6   | 1.0   | 1.3   | 5.1             | 1.3             | 1.4        | 3.2              | 1.2         | 1.3        | 4.8   | 1.2   | 0.9   | 0.8   |  |  |
| <i>Nox3</i>                           | 1.8             | 1.4             | 1.6        | 2.0              | 2.5         | 1.7        | 0.7   | 0.6   | 22.7  | 26.6  | 1.0                | 0.4             | 1.1        | 0.9              | 0.7         | 0.3        | 1.1   | 0.9   | 2.7   | 2.1   | 4.1             | 2.6             | 2.5        | 2.4              | 3.2         | 1.1        | 1.9   | 1.1   | 0.8   | 1.4   |  |  |
| <i>Nox4</i>                           | 2.2             | 1.5             | 1.8        | 2.4              | 2.1         | 3.3        | 0.8   | 0.6   | 23.5  | 21.8  | 0.9                | 1.2             | 1.2        | 1.0              | 1.0         | 1.1        | 1.3   | 1.5   | 1.5   | 1.2   | 2.1             | 2.9             | 2.0        | 2.9              | 2.2         | 1.9        | 1.2   | 1.4   | 1.0   | 1.2   |  |  |
| <i>Noxa1</i>                          | 1.2             | 1.1             | 0.9        | 1.0              | 0.9         | 1.0        | 1.0   | 0.9   | 0.8   | 0.8   | 0.7                | 1.2             | 0.9        | 2.5              | 1.8         | 1.8        | 2.0   | 1.4   | 1.5   | 1.2   | 2.1             | 1.2             | 1.3        | 1.6              | 1.1         | 1.1        | 2.3   | 1.1   | 1.0   | 1.0   |  |  |
| <i>Noxo1</i>                          | 1.2             | 1.1             | 0.9        | 1.0              | 0.9         | 1.0        | 1.0   | 1.0   | 1.2   | 1.1   | 1.1                | 1.3             | 1.4        | 1.7              |             |            |       |       |       |       |                 |                 |            |                  |             |            |       |       |       |       |  |  |

**Table S2: Gene expression in organoids after stimulation with TLR ligands or cytokines, (Related to Figure 6).**

Nanostring analysis of gene expression changes induced by stimulation with TLR ligands or cytokines for 4 hours. Genes are grouped into functional categories. Numbers are fold change of normalized transcript counts in stimulated over unstimulated organoids (averaged between three independent experiments). Significantly increased genes ( $p \leq 0.05$ ) are shown in shades of red, with darker red indicating increased levels of significance. Significantly decreased genes ( $p \leq 0.05$ ) are shown in shades of blue, with darker blue indicating increased levels of significance. Significance was calculated by comparing normalized transcript counts in stimulated vs. unstimulated organoids using one-way ANOVA.



## Table S3

| REAGENT or RESOURCE                         | SOURCE      | IDENTIFIER |
|---------------------------------------------|-------------|------------|
| Oligonucleotides                            |             |            |
| Ccl20 F primer: GCCTCTCGTACATACAGACGC       | Primer Bank | N/A        |
| Ccl20 R primer: CCAGTTCTGCTTTGGATCAGC       | Primer Bank | N/A        |
| Cxcl1 F primer: CTGGGATTCACCTCAAGAACATC     | Primer Bank | N/A        |
| Cxcl1 R primer: CAGGGTCAAGGCAAGCCTC         | Primer Bank | N/A        |
| Cxcl2 F primer: CCAACCACCAGGCTACAGG         | Primer Bank | N/A        |
| Cxcl2 R primer: GCGTCACACTCAAGCTCTG         | Primer Bank | N/A        |
| Csf1 F primer: GACTTCATGCCAGATTGCC          | Primer Bank | N/A        |
| Csf1 R primer: GGTGGCTTTAGGGTACAGG          | Primer Bank | N/A        |
| Tnf F primer: CCTGTAGCCCACGTCGTAG           | Primer Bank | N/A        |
| Tnf R primer: GGGAGTAGACAAGGTACAACCC        | Primer Bank | N/A        |
| Tnfaip3 F primer: CTGGATGTCAATCAACAATGGGA   | Primer Bank | N/A        |
| Tnfaip3 R primer: ACTAGGGTGTGAGTGTTTTCTGT   | Primer Bank | N/A        |
| Nfkbia F primer: GAAGCCGCTGACCATGGAA        | Primer Bank | N/A        |
| Nfkbia R primer: GATCACAGCCAAGTGGAGTGGA     | Primer Bank | N/A        |
| Nos2 F primer: GTTCTCAGCCCAACAATACAAGA      | Primer Bank | N/A        |
| Nos2 R primer: GTGGACGGGTCGATGTCAC          | Primer Bank | N/A        |
| Duox2 F primer: AAGTTCAAGCAGTACAAGCGAT      | Primer Bank | N/A        |
| Duox2 R primer: TAGGCACGGTCTGCAAACAG        | Primer Bank | N/A        |
| Birc3 F primer: ACGCAGCAATCGTGCAATTTG       | Primer Bank | N/A        |
| Birc3 R primer: CCTATAACGAGGTCACACTGACGG    | Primer Bank | N/A        |
| Beta actin F primer: GGCTGTATTCCCCTCCATCG   | Primer Bank | N/A        |
| Beta actin R primer: CCAGTTGGTAACAATGCCATGT | Primer Bank | N/A        |

**Table S3: Quantitative RT-PCR primers, (Related to STAR methods).**

Oligonucleotide primers used for measuring gene expression in stimulated organoids.
